# Supplementary material
Source: publisher site journal article supplement (https://www.dovepress.com/article/456543)
Supplement: Supplementary file 1 [file get_supplementary_file.php]

**Supplementary file 1**

**Ophthalmic examination**

- Clinical activity score (CAS)
- Evaluation of eyelid symptoms in grade 0-3
- Evaluation of eyelid symptoms in grade 0-3


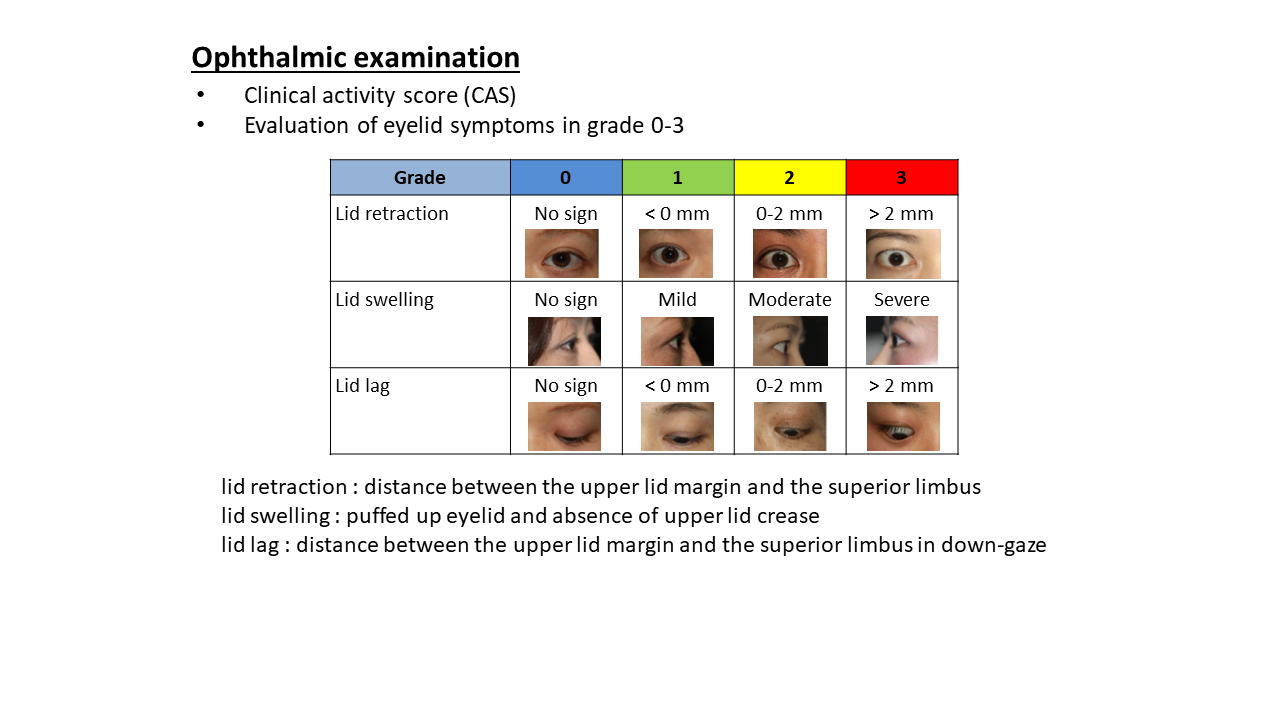


lid retraction: distance between the upper lid margin and the superior limbus

lid swelling: puffed up eyelid and absence of upper lid crease

lid lag: distance between the upper lid margin and the superior limbus in down-gaze
